# Supplementary material for: Chromate in food samples: an artefact of wrongly applied analytical methodology?
Source: Royal Society of Chemistry journal article supplement (doi:10.1039/c3ja30233d), 2013-01-01
Supplement: c3ja30233d.pdf [file c3ja30233d.pdf]

**Table 1 (supplementary)** ICP-MS operating parameters

| Parameter                               | Value                                                |
|-----------------------------------------|------------------------------------------------------|
| <i>Plasma conditions</i>                |                                                      |
| Forward power                           | 1550 W                                               |
| Plasma gas flow                         | 15.0 L min <sup>-1</sup>                             |
| Carrier gas flow                        | 0.64 L min <sup>-1</sup>                             |
| Dilution gas flow                       | 0.53 L min <sup>-1</sup>                             |
| Total carrier gas flow                  | 1.17 L min <sup>-1</sup>                             |
| He gas flow                             | 10 mL min <sup>-1</sup>                              |
| QP bias                                 | - 97 V                                               |
| Oct bias                                | -100 V                                               |
| Cell entrance                           | -130 V                                               |
| Cell exit                               | -150 V                                               |
| Deflect                                 | -80 V                                                |
| Plate bias                              | -150 V                                               |
| Nebuliser type                          | Miramist                                             |
| Sample uptake rate                      | 1.5 mL min <sup>-1</sup>                             |
| <i>Data acquisition parameters</i>      |                                                      |
| m/z isotopes monitored in Cr speciation | <sup>50</sup> Cr, <sup>52</sup> Cr, <sup>53</sup> Cr |
| m/z isotopes of internal standards      | <sup>45</sup> Sc, <sup>72</sup> Ge                   |
| Total acquisition time                  | 599 s                                                |

**Table 2 (supplementary)** Determination of total Cr in SRM 1573a Tomato leaves by ICP-MS and Cr(VI) in certified reference material CRM 544, Cr(VI) in lyophilised solution and CRM 545, Cr(VI) in welding dust by HPLC-ICP-MS (number of replicates = 3)

| Concentration | SRM 1573a<br>(mg Cr kg <sup>-1</sup> ) | CRM 544<br>(µg Cr(VI) L <sup>-1</sup> ) | CRM 545<br>(g Cr(VI) kg <sup>-1</sup> ) |
|---------------|----------------------------------------|-----------------------------------------|-----------------------------------------|
| Determined    | 1.98±0.01                              | 23.5±0.7                                | 40.5±0.6                                |
| Certified     | 1.99±0.06                              | 22.8±1.0                                | 40.2±0.6                                |

**Table 3 (supplementary)** LODs and LOQs for determination of Cr species by HPLC-ICP-MS in aqueous solutions (pH 4.5). Cr (VI) isotopes were recorded at m/z 50 and 52 and Cr(III) isotopes at m/z 52 and 53, respectively

| Parameter | $(\mu\text{g Cr(VI) L}^{-1})$ |        | $(\mu\text{g Cr(III) L}^{-1})$ |        |
|-----------|-------------------------------|--------|--------------------------------|--------|
|           | m/z 50                        | m/z 52 | m/z 52                         | m/z 53 |
| LOD       | 0.02                          | 0.03   | 0.02                           | 0.03   |
| LOQ       | 0.07                          | 0.11   | 0.07                           | 0.10   |
